# Supplementary material for: Mechanical approach for creating different molecular adducts and regulating salt polymorphs: a case study of the anti-inflammatory medication ensifentrine
Source: Royal Society of Chemistry journal article supplement (doi:10.1039/d4mr00056k), 2024-01-01
Supplement: d4mr00056k1.pdf [file d4mr00056k1.pdf]

## *Supporting Information For*

# **Mechanical approach for creating different molecular adducts and regulating salt polymorphs: A case study of the anti-inflammatory medication Ensifentrine**

Ananya Kar,<sup>a</sup> Lopamudra Giri,<sup>\*b</sup> Gowtham Kenguva,<sup>a</sup> Smruti Rekha Rout<sup>a</sup>, and Rambabu Dandela<sup>\*a</sup>

<sup>a</sup>Department of Industrial and Engineering Chemistry, Institute of Chemical Technology-

Indian Oil Bhubaneswar Campus, Bhubaneswar, India. E-mail:

[r.dandela@iocb.ictmumbai.edu.in](mailto:r.dandela@iocb.ictmumbai.edu.in)

<sup>b</sup>Department of Chemistry, Odisha University of Technology and Research, (Formerly CET),

Bhubaneswar, India. E-mail: lopamudra7giri@gmail.com

| <b>Contents</b>                                                                                                                                                                         |
|-----------------------------------------------------------------------------------------------------------------------------------------------------------------------------------------|
| <b>Table S1.</b> $pK_a$ values of ENSE and salt formers.                                                                                                                                |
| <b>Figure S1.</b> PXRD screening method to evaluate the probable production of binary adducts between ENSE and GRAS co-former.                                                          |
| <b>Figure S2.</b> Optical microscopic images of different solid forms of ENSE.                                                                                                          |
| <b>Figure S3.</b> ORTEP view of (a) ENSE.MAL( $\alpha$ ), (b) ENSE.MAL( $\beta$ ), (c) ENSE.PTH (d) ENSE.SAL and (e) ENSE.SAC. Herein, the ellipsoids are drawn with a 50% probability  |
| <b>Table S2.</b> Hydrogen bond distances ( $\text{\AA}$ ) and angles ( $^\circ$ ) of molecular adducts of ENSE.                                                                         |
| <b>Figure S4.</b> A comparative PXRD overlay of all the solid forms of ENSE (a) ENSE.MAL (a), (b) ENSE.MAL (b), (c) ENSE.PTH, (d) ENSE.SAL and (e) ENSE.SAC with its simulated pattern. |
| <b>Figure S5.</b> TGA profiles of various molecular adducts of ENSE.                                                                                                                    |

**Details of the solubility parameters of solid forms of ENSE**

**Figure S6.** Overlay PXRD of ENSE solid forms before and after the solubility test, relative to their starting materials.

**Figure S7.** Illustration of molecular recognition between ENSE molecules.

**Figure S8.** ORTEP view of ENSE.Cl. Herein, the ellipsoids are drawn with a 50% probability.

**Table S3.** Crystallographic Parameters of ENSE.Cl.

**Figure S9.** Following the solubility test, a comparative PXRD overlay of all the solid forms of ENSE showed the development of discrete, stable adducts that matched the simulated pattern of ENSE.Cl.

**Table S1.** pK<sub>a</sub><sup>a</sup> values of ENSE and salt formers and obtained adducts.

| <b>Compound name</b>                 | <b>pK<sub>a</sub><br/>(acidic medium)</b> | <b>pK<sub>a</sub><br/>(basic medium)</b> | <b>ΔpK<sub>a</sub> between<br/>ENSE and co-<br/>former</b> | <b>Obtained<br/>forms</b> |
|--------------------------------------|-------------------------------------------|------------------------------------------|------------------------------------------------------------|---------------------------|
| Ensifentrine (ENSE)                  | 14.74                                     | 5.23                                     | -----                                                      | -----                     |
| Malonic Acid (MAL)                   | 4.43                                      | 5.41                                     | 9.33, 0.80                                                 | Salt                      |
| Saccharin (SAC)                      | 1.60                                      | 1.8                                      | 12.94, 3.63                                                | Salt                      |
| Succinic Acid                        | 4.2                                       | 5.6                                      | 9.14, 1.03                                                 | Mixture                   |
| Glutaric Acid                        | 4.34                                      | 5.22                                     | 9.52, 0.89                                                 | Mixture                   |
| Adipic Acid                          | 4.41                                      | 5.41                                     | 9.33, 0.82                                                 | Mixture                   |
| Pimelic Acid                         | 4.71                                      | 5.58                                     | 9.16, 0.52                                                 | Mixture                   |
| Suberic Acid                         | 4.52                                      | 5.49                                     | 10.22, 0.71                                                | Mixture                   |
| Azelaic Acid                         | 4.55                                      | 5.49                                     | 9.25, 0.68                                                 | Mixture                   |
| Fumaric Acid                         | 3.03                                      | 4.45                                     | 10.29, 2.2                                                 | Mixture                   |
| L-Malic Acid                         | 3.4                                       | 5.2                                      | 9.54, 1.83                                                 | Mixture                   |
| (+)-Tartaric Acid                    | 2.89                                      | 4.4                                      | 10.34, 2.34                                                | Mixture                   |
| Isophthalic Acid                     | 3.46                                      | 4.46                                     | 10.28, 1.77                                                | Mixture                   |
| Terephthalic Acid                    | 3.54                                      | 4.34                                     | 10.4, 1.69                                                 | Mixture                   |
| 3-Hydroxybenzoic acid(3-HBA)         | 3.84                                      | 6.1                                      | 8.64, 1.39                                                 | Mixture                   |
| Phthalic Acid                        | 2.89                                      | 5.51                                     | 9.23, 2.34                                                 | Salt                      |
| Salicylic Acid                       | 2.79                                      | 6.3                                      | 8.44, 2.44                                                 | Salt                      |
| 4-Hydroxybenzoic acid(4-HBA)         | 4.58                                      | 9.49                                     | 5.25, 0.65                                                 | Mixture                   |
| 2,4-Dihydroxybenzoic acid (2,4-DHBA) | 3.1                                       | 5.8                                      | 8.94, 2.13                                                 | Mixture                   |
| 2,5-Dihydroxybenzoic acid            | 2.97                                      | 5.9                                      | 8.84, 2.26                                                 | Mixture                   |

<sup>a</sup>pK<sub>a</sub> values were determined using Marvin 5.10.1, 2012, ChemAxon, <http://www.chemaxon.com>. These values are closely resembling with pK<sub>a</sub> values compiled by R. Williams.

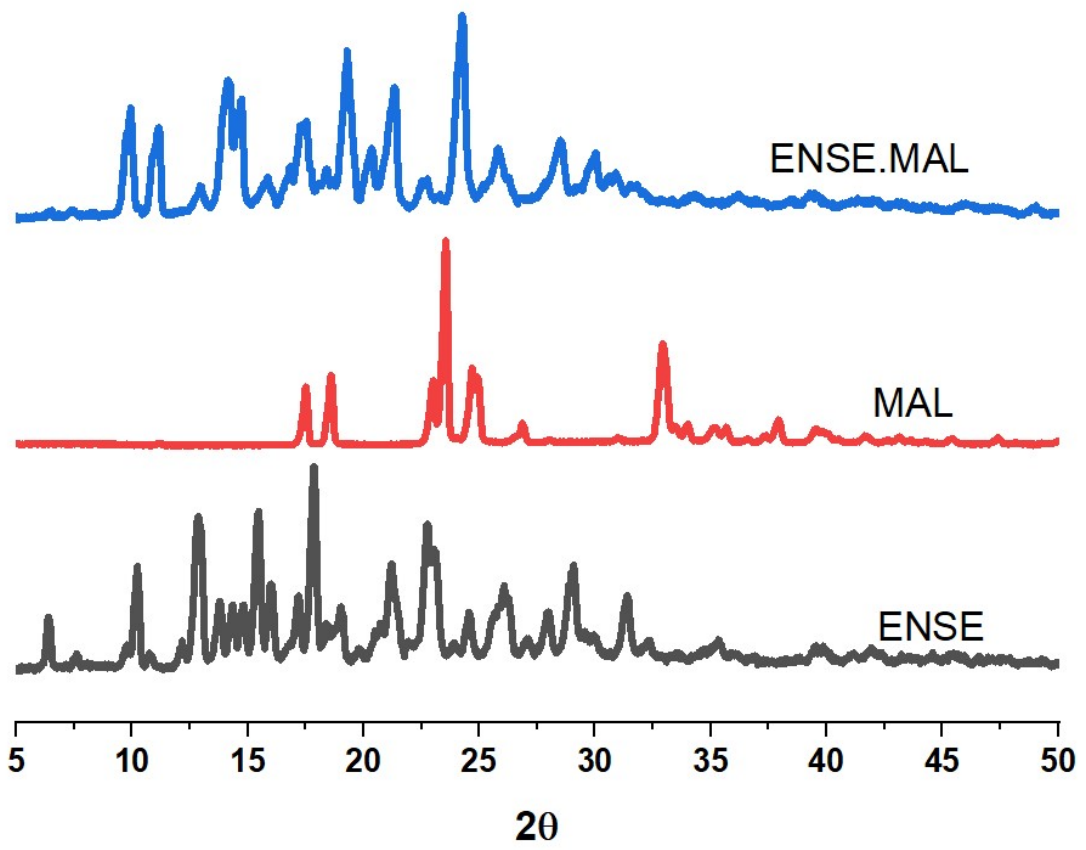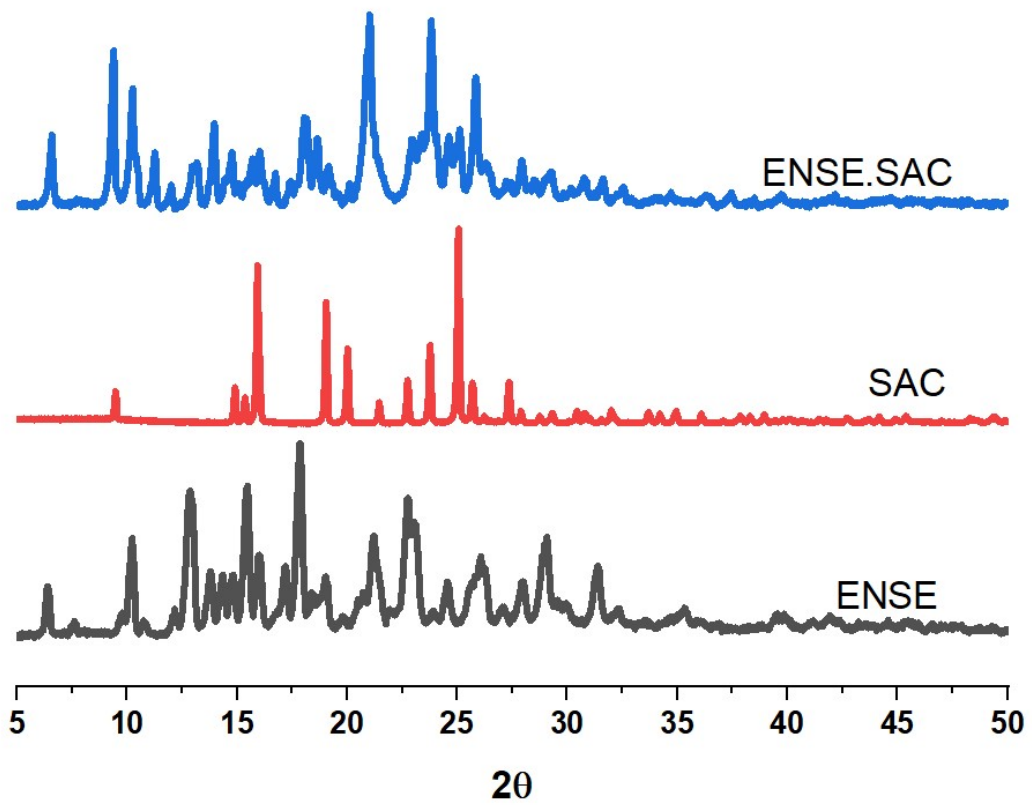

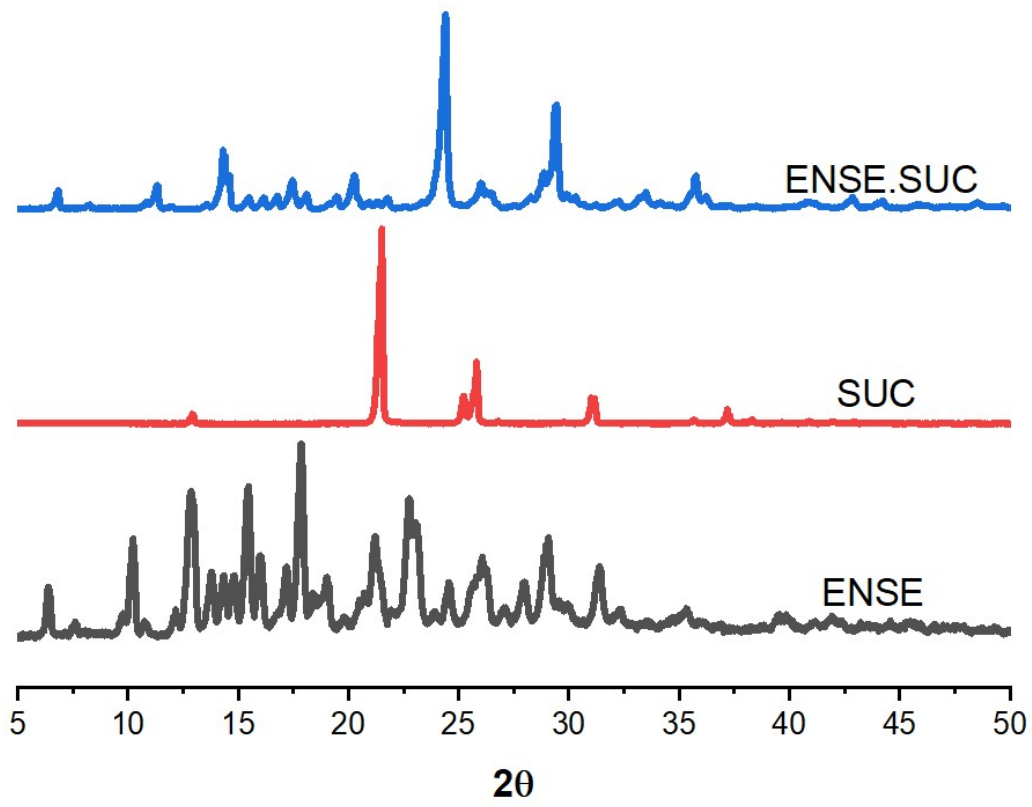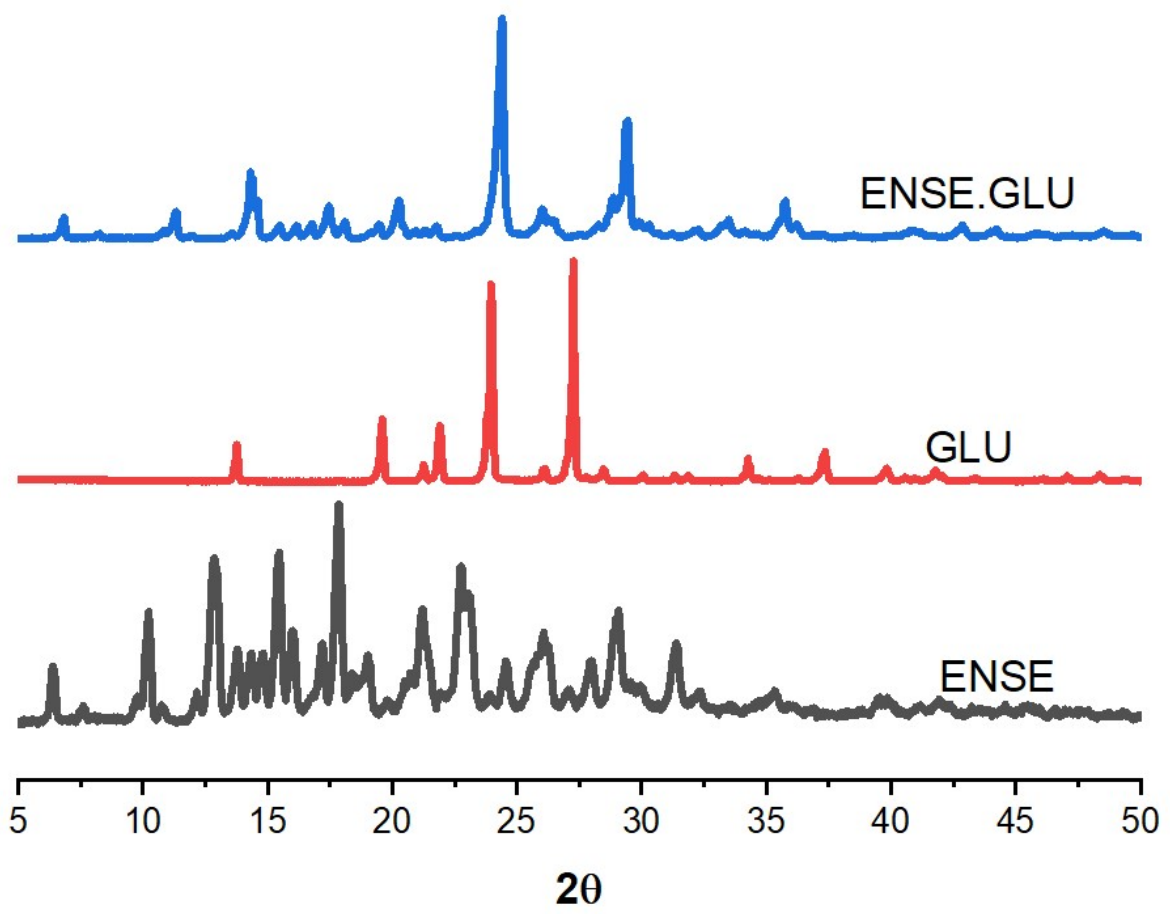

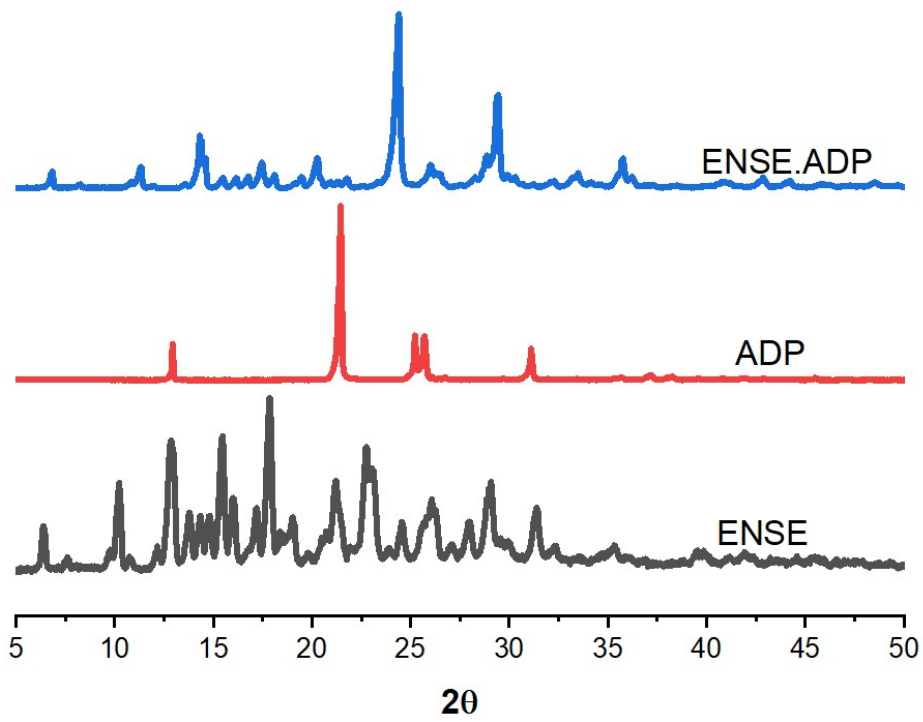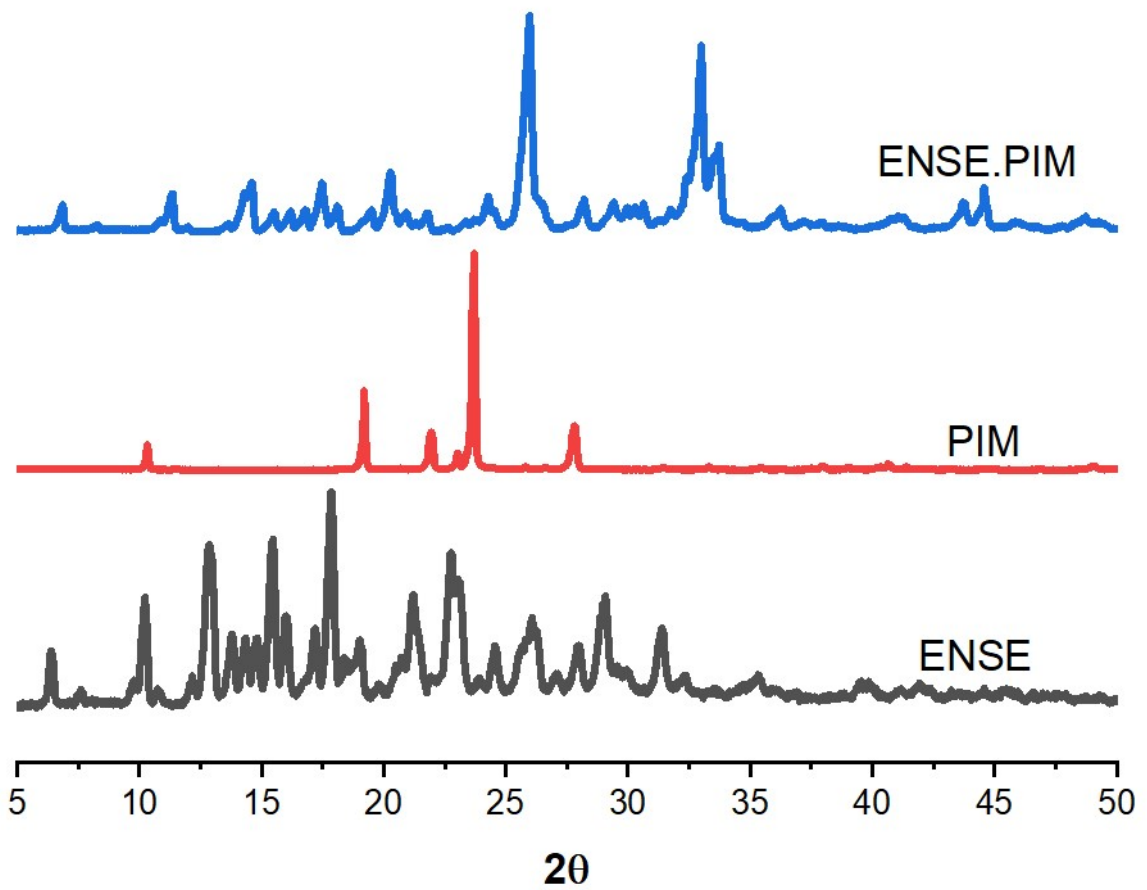

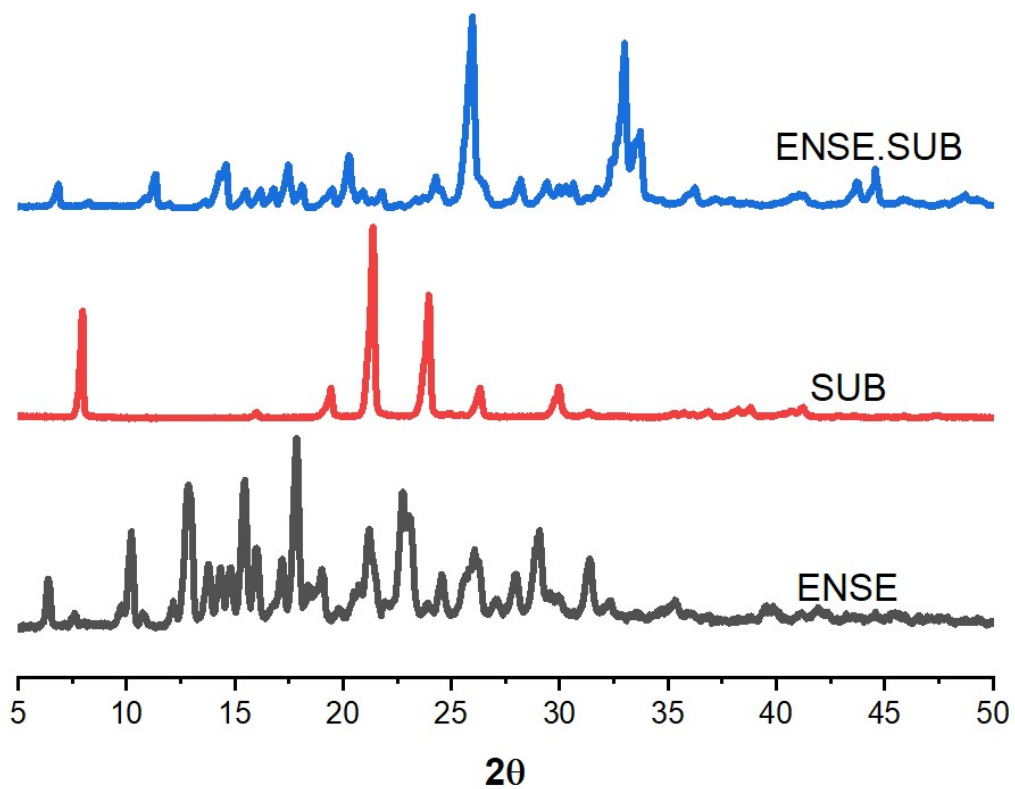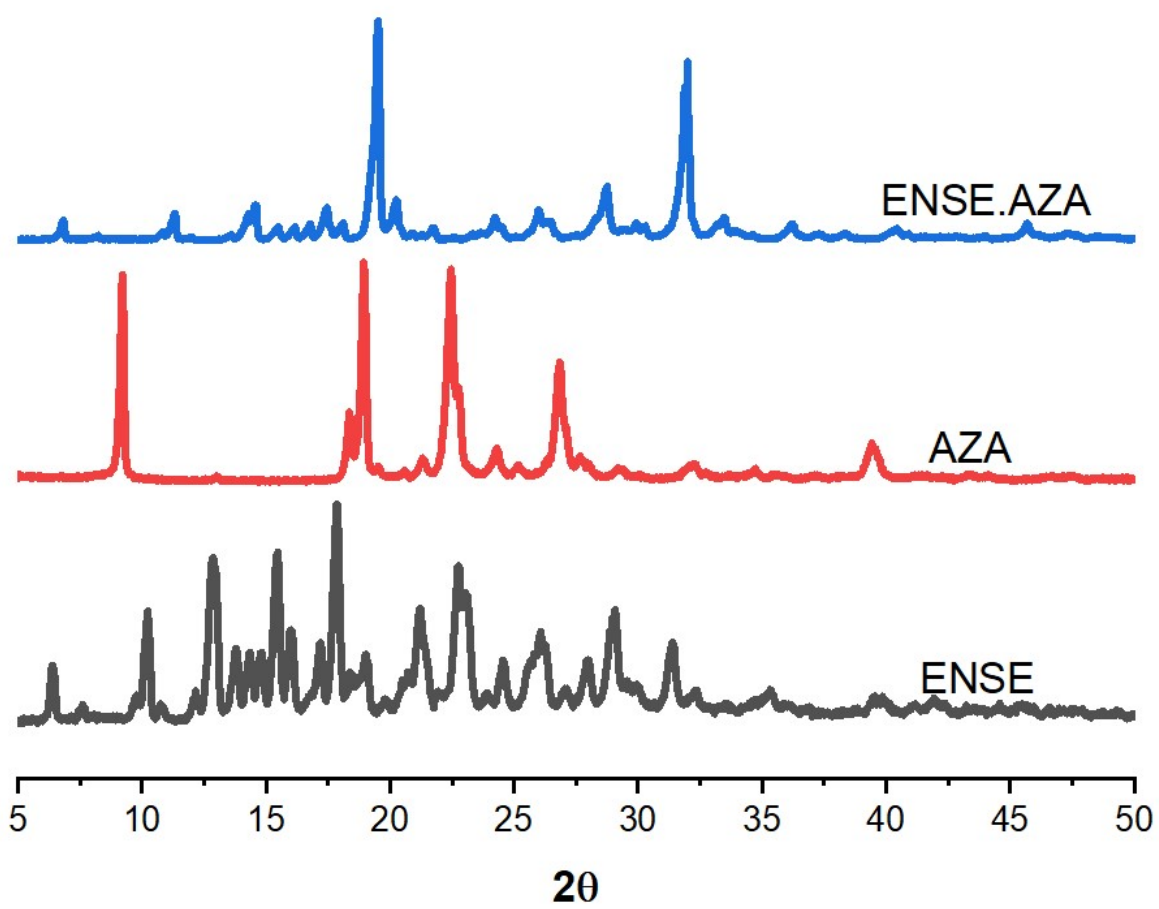

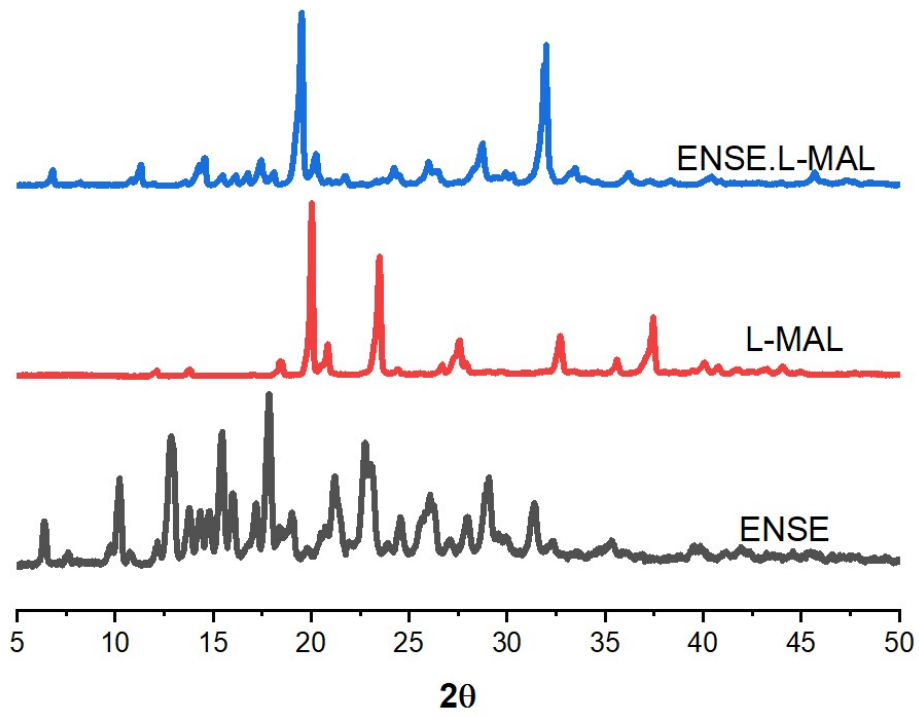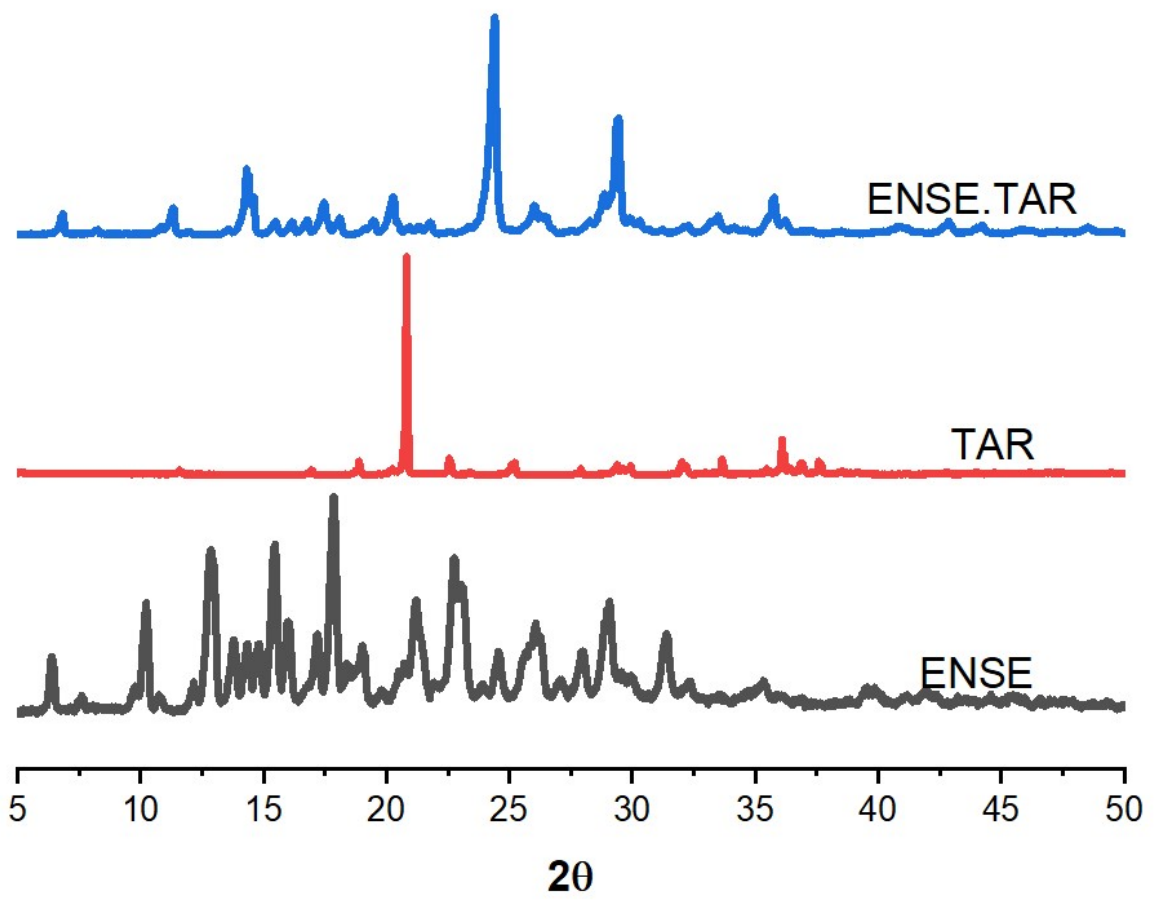



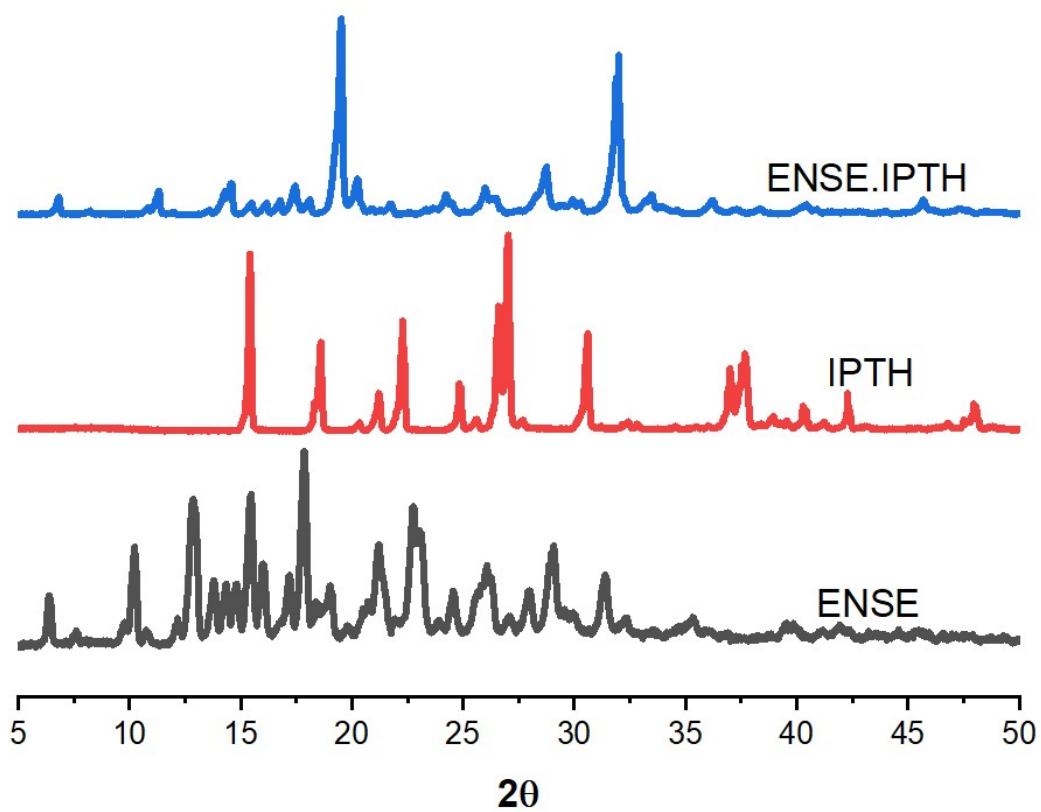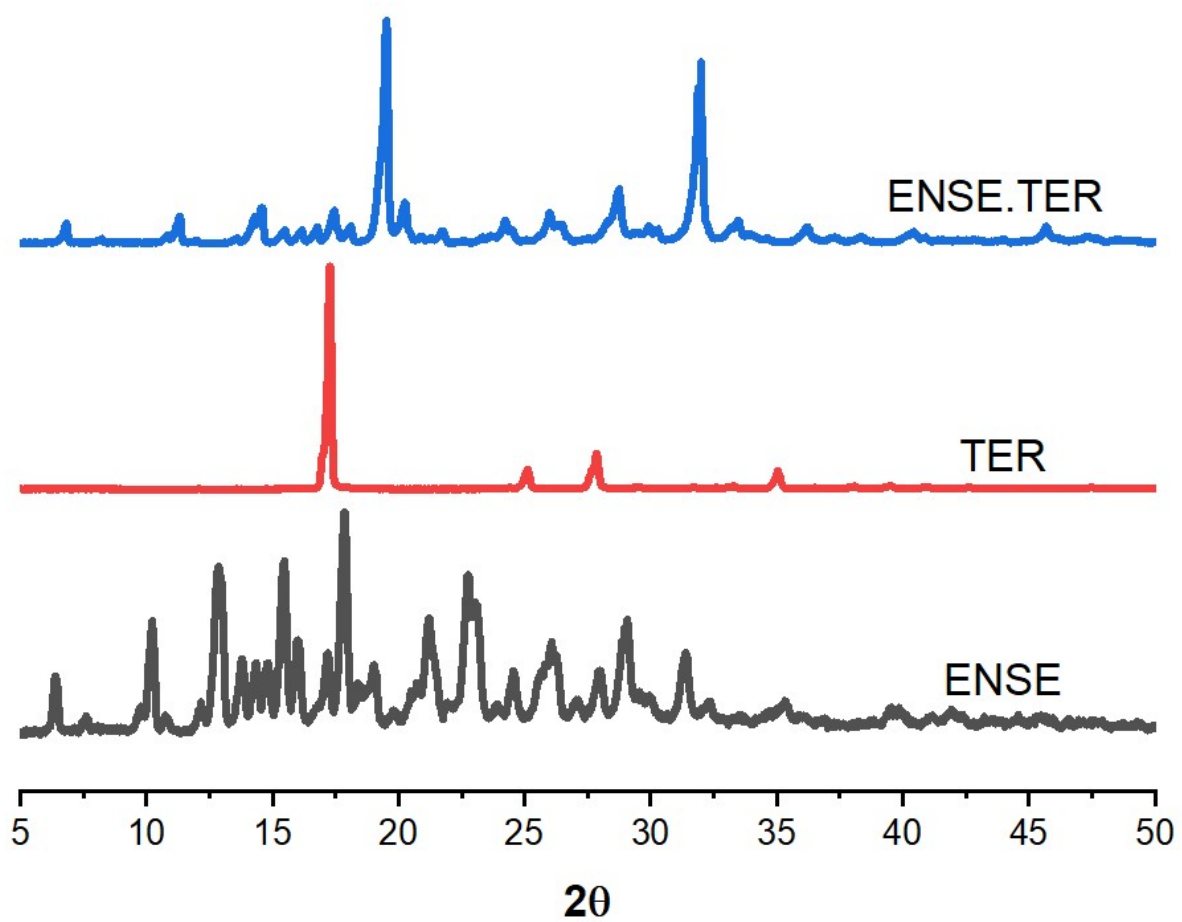

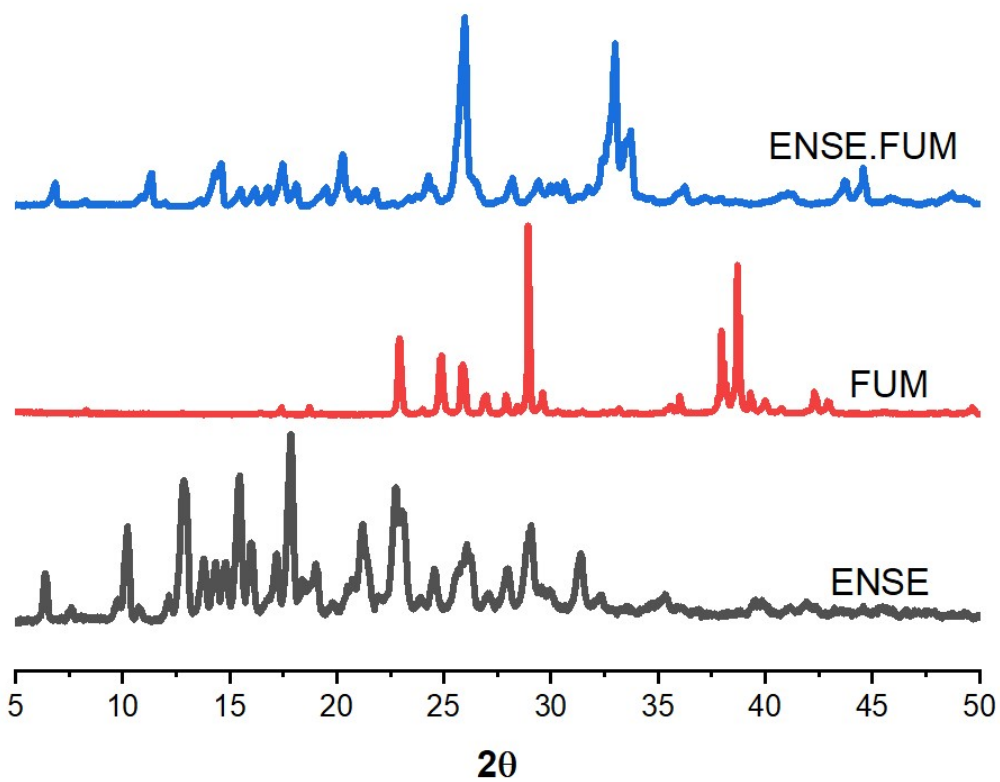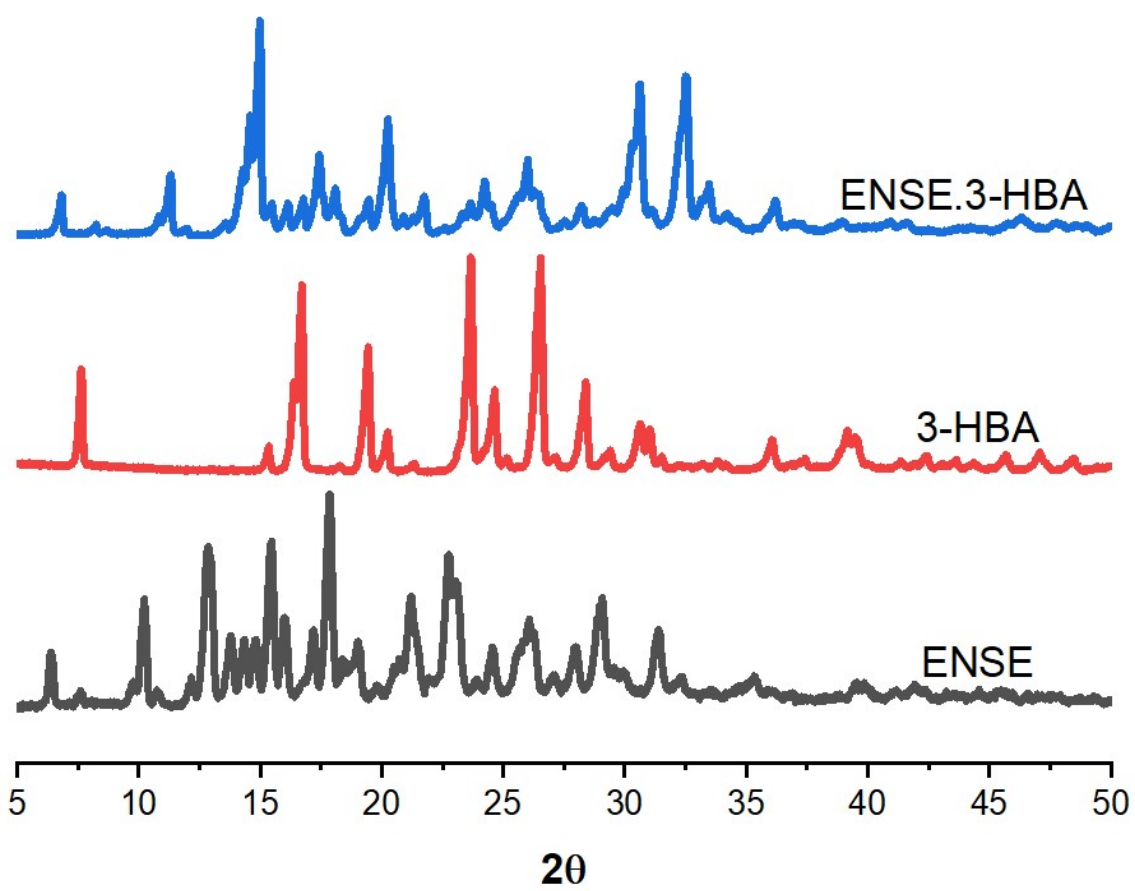

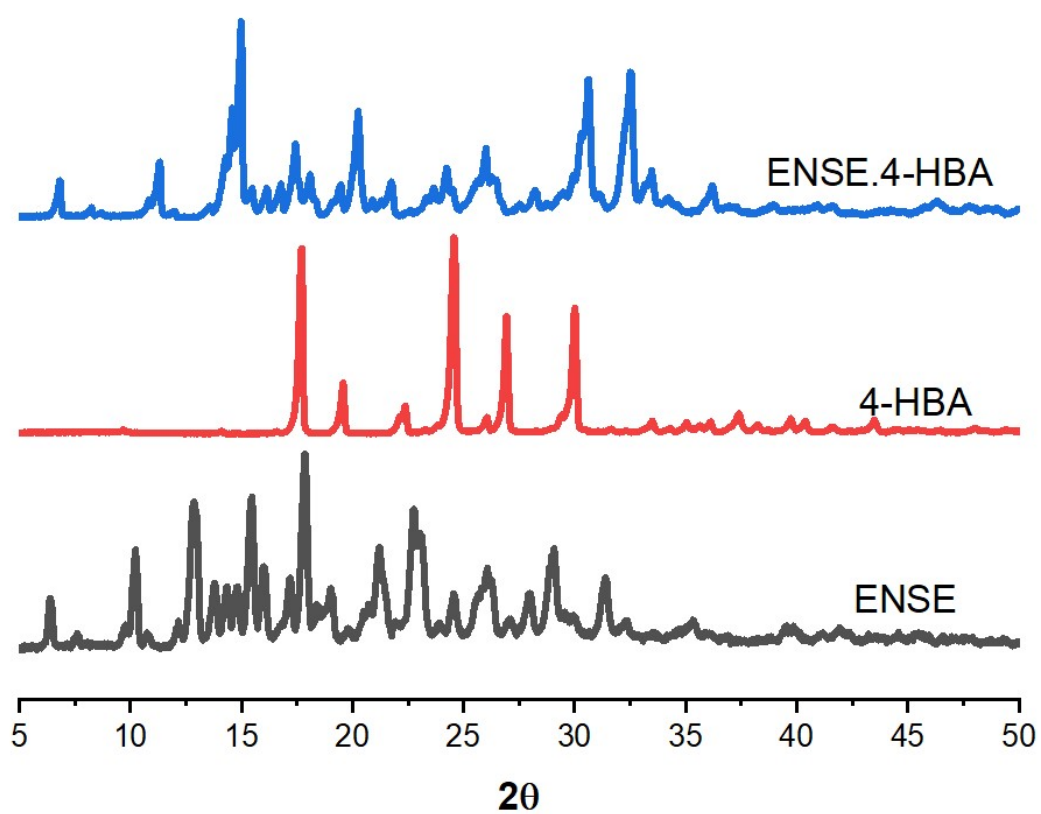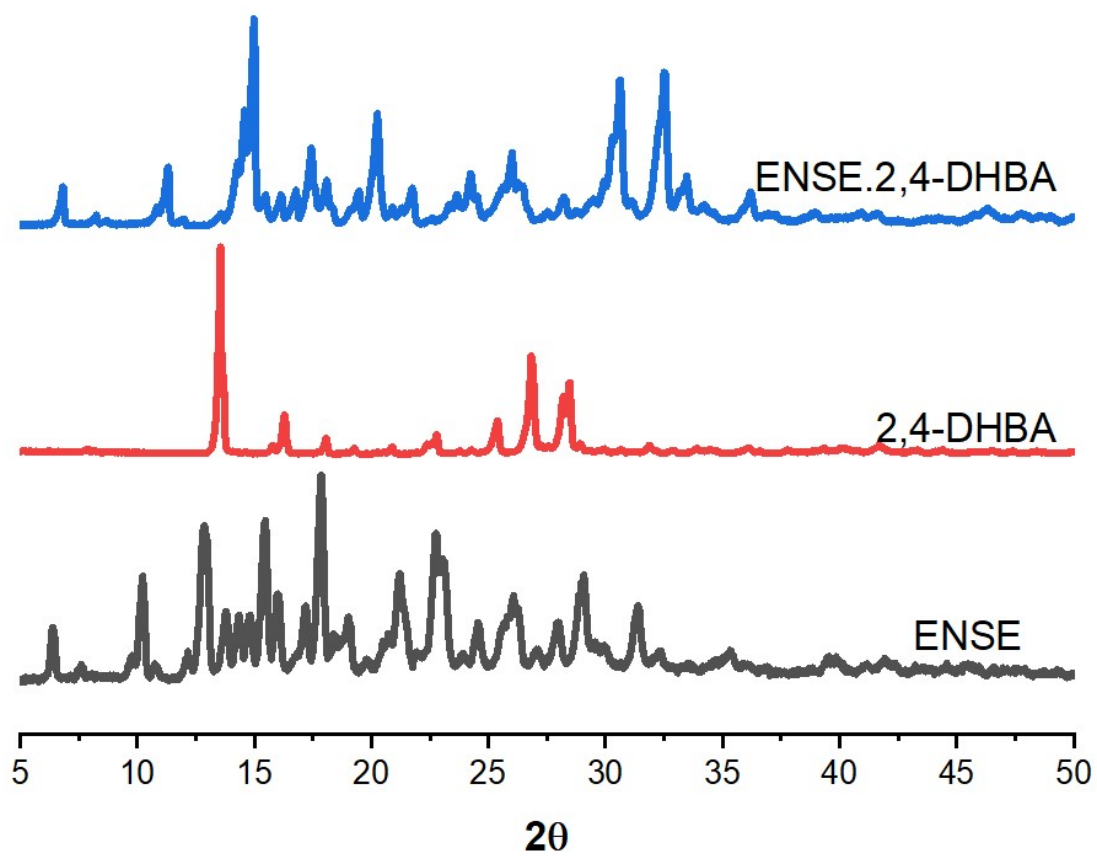

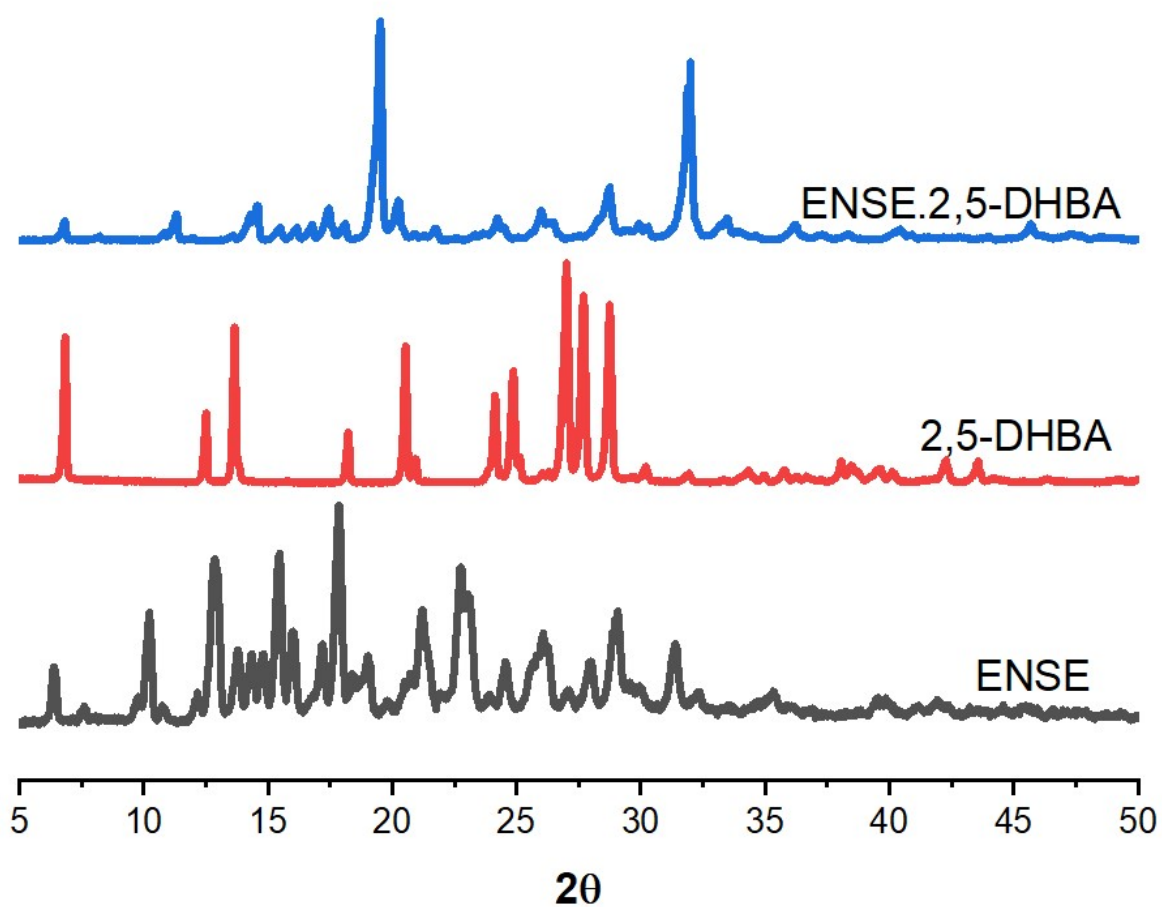

**Figure S1.** PXR D screening method to evaluate the probable production of binary adducts between ENSE and GRAS co-former.

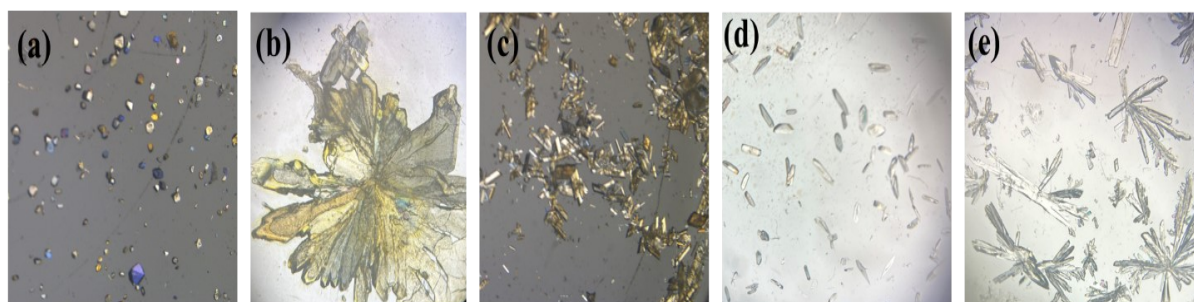

**Figure S2.** Optical microscopic images of different solid forms of ENSE.

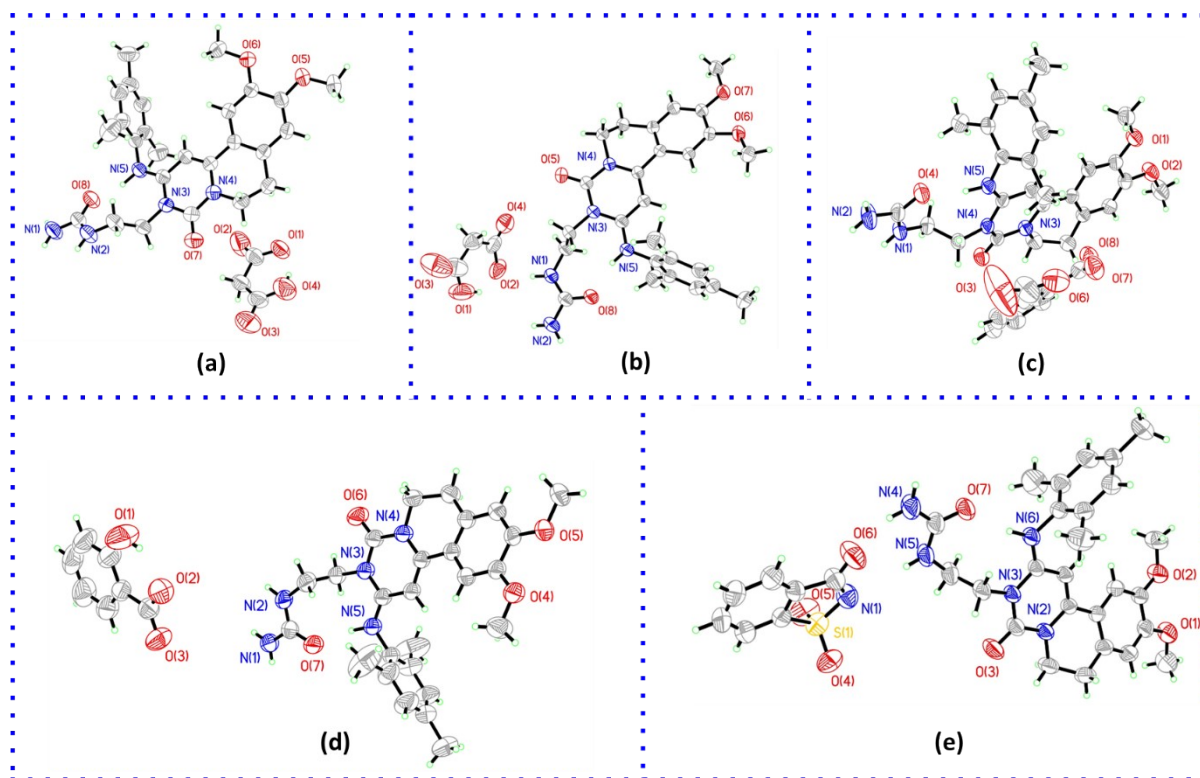

**Figure S3.** ORTEP view of (a) ENSE.MAL( $\alpha$ ), (b) ENSE.MAL( $\beta$ ), (c) ENSE.PTH (d) ENSE.SAL and (e) ENSE.SAC. Herein, the ellipsoids are drawn with a 50% probability.

**Table S2.** Hydrogen bond distances ( $\text{\AA}$ ) and angles ( $^\circ$ ) of molecular adducts of ENSE.

| Solid forms          | $D-H\cdots A$                    | $D-H(\text{\AA})$ | $H\cdots A(\text{\AA})$ | $D-A(\text{\AA})$ | $D-H\cdots A(^\circ)$ |
|----------------------|----------------------------------|-------------------|-------------------------|-------------------|-----------------------|
| ENSE.MAL( $\alpha$ ) | O4-H4 $\cdots$ O1 $^-$ (Intra)   | 0.820             | 1.69                    | 2.451(1)          | 154                   |
|                      | N2-H100 $\cdots$ O1 $^-$         | 0.890             | 2.01                    | 2.902(1)          | 174                   |
|                      | N1-H1B $\cdots$ O2               | 0.860             | 2.06                    | 2.901(2)          | 166                   |
|                      | N1-H1A $\cdots$ O2               | 0.860             | 2.21                    | 2.982(1)          | 149                   |
|                      | N5 $^+$ -H103 $\cdots$ O8(Intra) | 1.040             | 1.65                    | 2.673(1)          | 165                   |
|                      | C15-H15 $\cdots$ O3              | 0.930             | 2.30                    | 3.231(1)          | 172                   |
|                      | C9-H101 $\cdots$ O2              | 0.962             | 2.42                    | 3.261(2)          | 148                   |
| ENSE.MAL( $\beta$ )  | O1-H6 $\cdots$ O2 $^-$ (Intra)   | 0.820             | 1.88                    | 2.456(1)          | 126                   |
|                      | N4 $^+$ -H5 $\cdots$ O8(Intra)   | 0.905             | 1.86                    | 2.749(1)          | 164                   |
|                      | N2-H2A $\cdots$ O4               | 0.860             | 2.05                    | 2.912(2)          | 176                   |
|                      | N2-H2B $\cdots$ O5               | 0.860             | 2.50                    | 3.117(1)          | 129                   |
|                      | N1-H2 $\cdots$ O2 $^-$           | 0.935             | 1.98                    | 2.903(1)          | 166                   |
|                      | C7-H7A $\cdots$ O2 $^-$          | 0.970             | 2.57                    | 3.377(1)          | 144                   |
| ENSE.PTH             | N2-H2A $\cdots$ O3               | 0.860             | 2.26                    | 3.111(1)          | 167                   |
|                      | N5 $^+$ -H80 $\cdots$ O4(Intra)  | 0.950             | 1.84                    | 2.785(2)          | 169                   |
|                      | N1-H1A $\cdots$ O8               | 0.860             | 2.18                    | 3.020(1)          | 164                   |

|                 |                                  |       |      |          |     |
|-----------------|----------------------------------|-------|------|----------|-----|
|                 | N2–H2B···O7 <sup>-</sup>         | 0.860 | 2.12 | 2.900(1) | 150 |
|                 | C17–H17A···O4                    | 0.960 | 2.71 | 3.111(1) | 143 |
|                 | C1–H1A···O5                      | 0.960 | 2.19 | 3.125(1) | 164 |
|                 | C31–H31···O4                     | 0.930 | 2.54 | 3.324(1) | 142 |
|                 | C–H2E···O2                       | 0.960 | 2.57 | 3.431(2) | 149 |
| <b>ENSE.SAL</b> | O1–H103···O2(Intra)              | 0.819 | 1.76 | 2.493(1) | 148 |
|                 | N2–H102···O2 <sup>-</sup>        | 0.906 | 2.04 | 2.997(1) | 176 |
|                 | N1–H1B···O3                      | 0.860 | 1.99 | 2.828(2) | 164 |
|                 | N5 <sup>+</sup> –H80···O7(Intra) | 0.961 | 1.76 | 2.719(3) | 170 |
|                 | N1–H1A···O3                      | 0.860 | 2.20 | 2.917(1) | 139 |
|                 | C19–H19B···O4                    | 0.970 | 2.47 | 3.263(1) | 139 |
|                 | C3–H3···O7                       | 0.930 | 2.90 | 3.783(2) | 158 |
| <b>ENSE.SAC</b> | N1–H71···N5 <sup>-</sup>         | 0.858 | 2.44 | 3.294(2) | 169 |
|                 | N4–H4A···O6                      | 0.860 | 2.25 | 2.876(1) | 129 |
|                 | N4–H4B···O6                      | 0.860 | 2.02 | 2.839(2) | 157 |
|                 | N6 <sup>+</sup> –H80···O7(Intra) | 0.907 | 1.91 | 2.804(2) | 167 |
|                 | C15–H15B···O2                    | 0.970 | 2.40 | 3.252(3) | 146 |
|                 | C27–H33···O7                     | 0.930 | 2.62 | 3.532(1) | 165 |

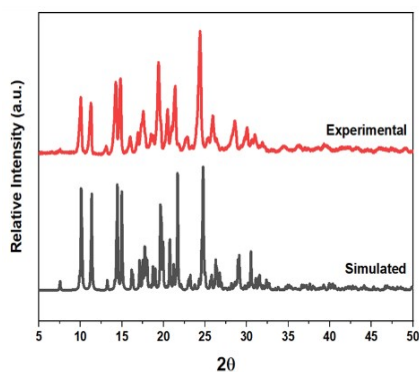

(a)

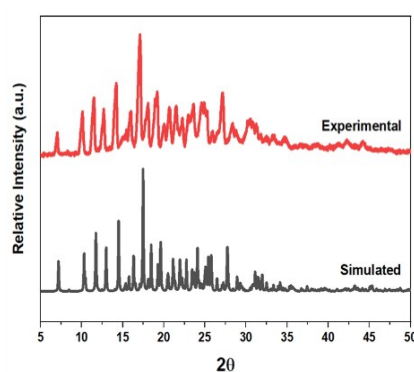

(b)

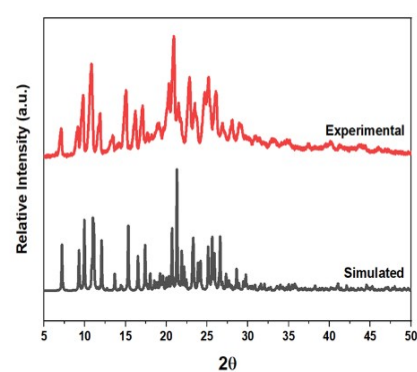

(c)

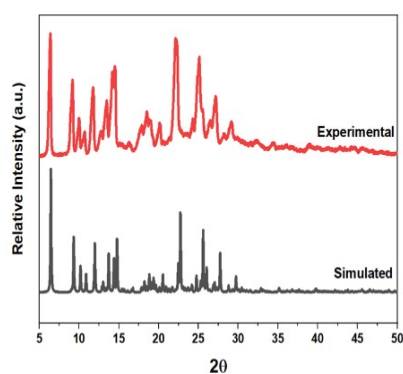

(d)

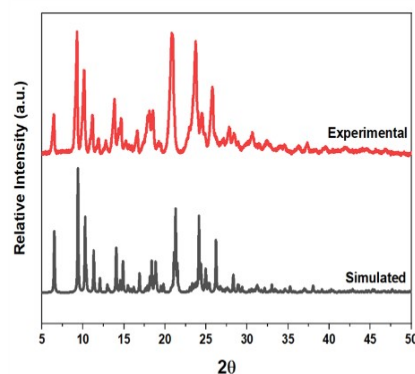

(e)



**Figure S4.** A comparative PXRD overlay of all the solid forms of ENSE (a) ENSE.MAL ( $\alpha$ ), (b) ENSE.MAL ( $\beta$ ), (c) ENSE.PTH, (d) ENSE.SAL and (e) ENSE.SAC with its simulated pattern.

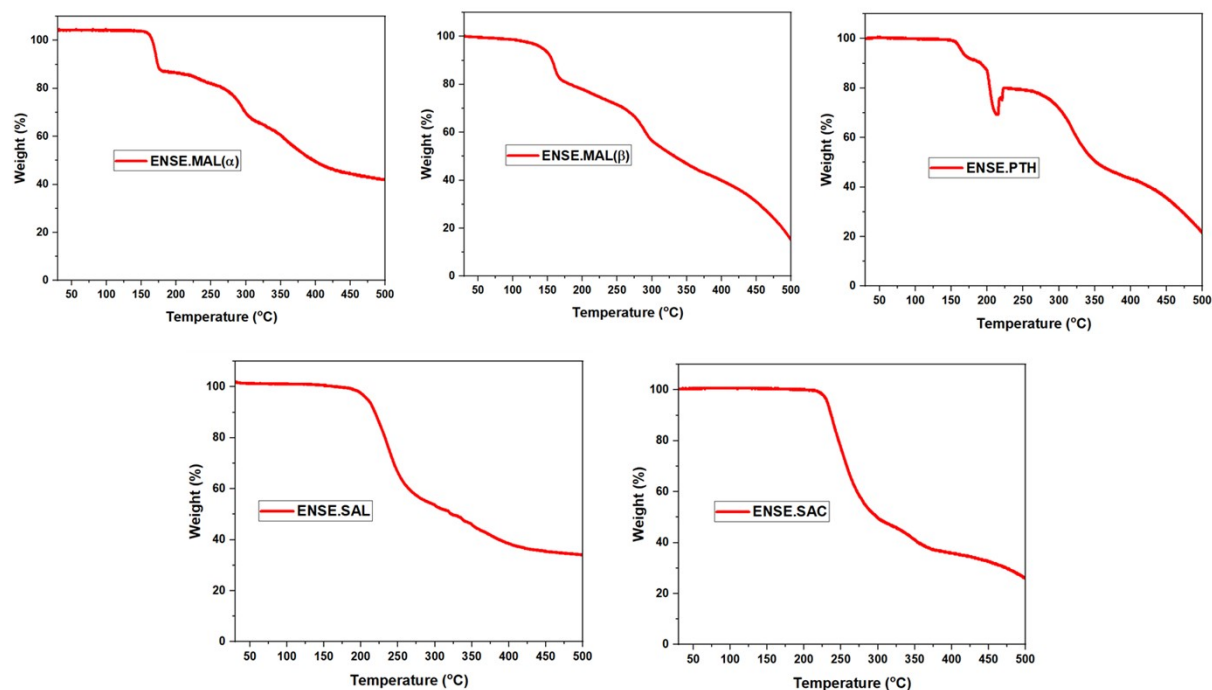

**Figure S5.** TGA profiles of various molecular adducts of ENSE.

### Details of the solubility parameters of solid forms of ENSE

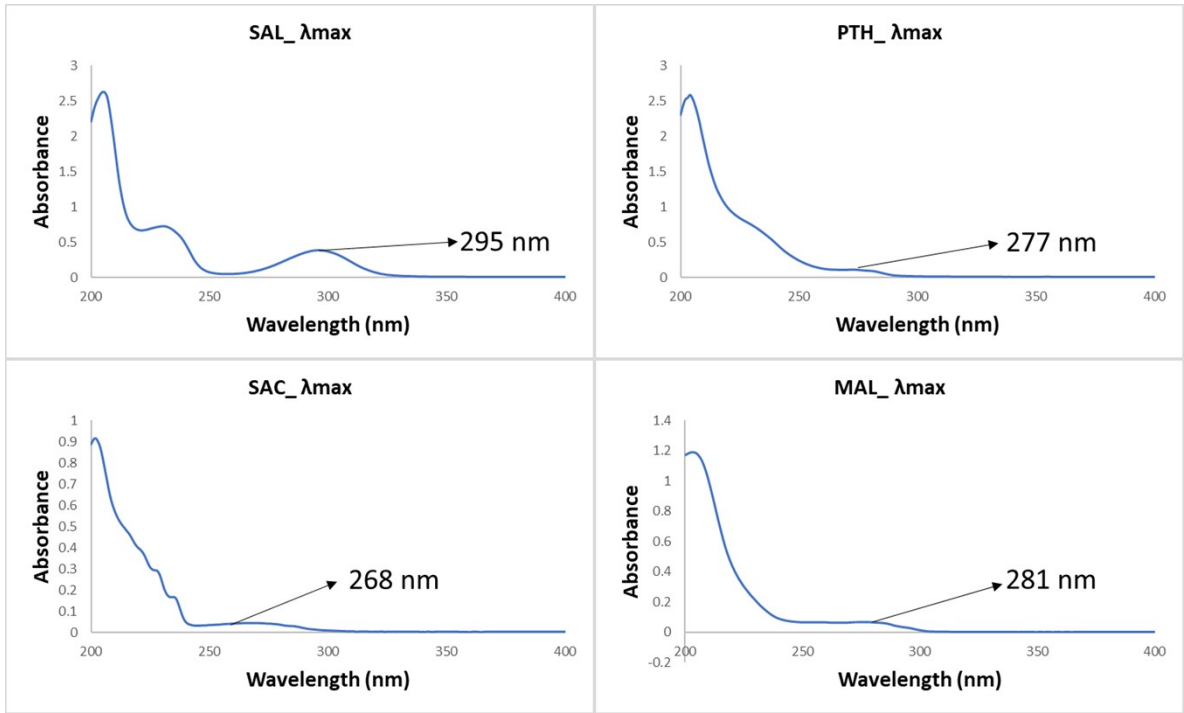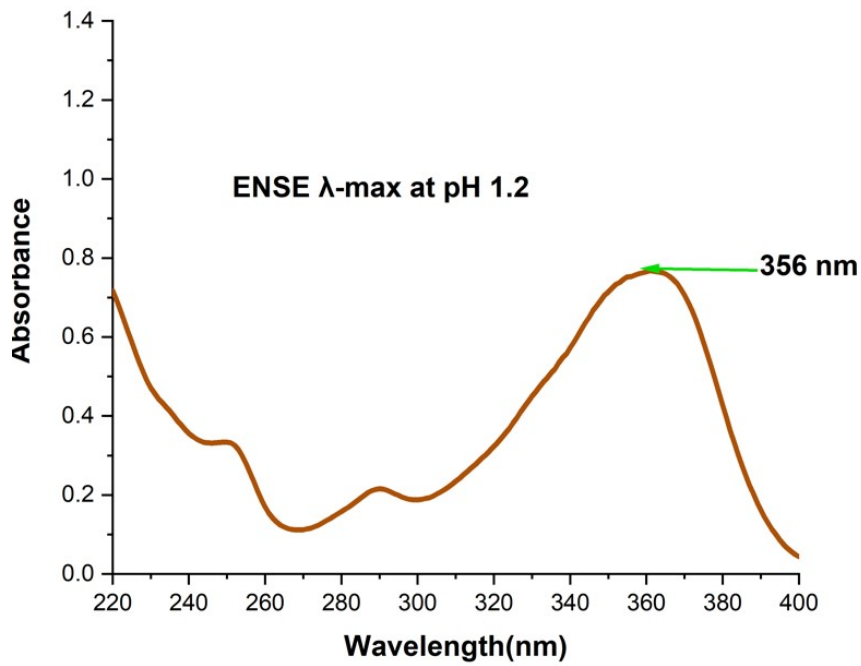



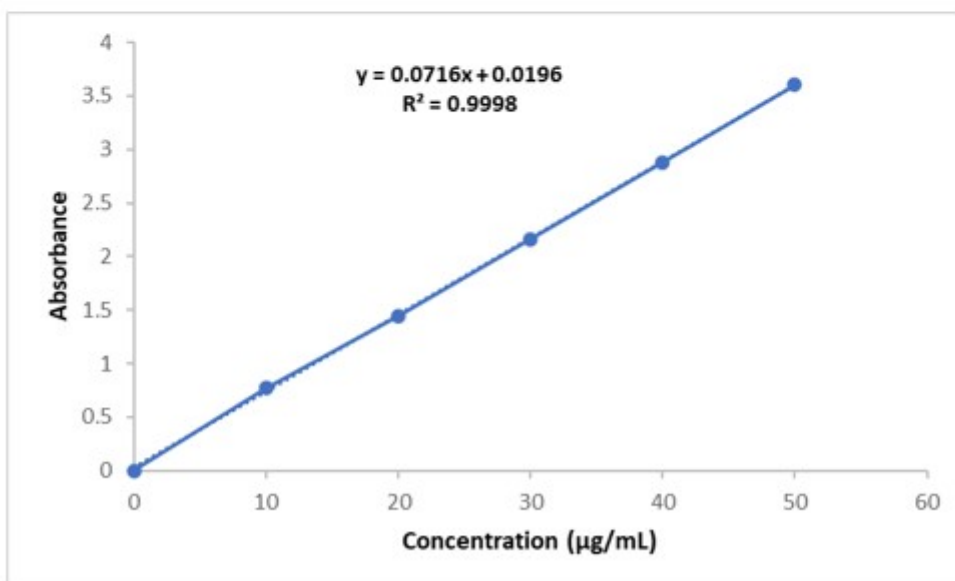

**Calibration graph of ENSE at pH 1.2.**

| S.No. | Sample Name          | Absorbance |       |       | Estimated Standard Deviation | Average Absorbance | Average Concentration (mg/mL) | Final solid phase |
|-------|----------------------|------------|-------|-------|------------------------------|--------------------|-------------------------------|-------------------|
| 1     | ENSE                 | 1.436      | 1.432 | 1.435 | 0.002                        | 1.434              | 19.795                        | SALT              |
| 2     | ENSE.MAL( $\alpha$ ) | 1.288      | 1.28  | 1.284 | 0.004                        | 1.284              | 17.722                        | SALT              |
| 3     | ENSE.MAL( $\beta$ )  | 1.282      | 1.28  | 1.281 | 0.001                        | 1.281              | 17.671                        | SALT              |
| 4     | ENSE.PTH             | 0.124      | 0.127 | 0.125 | 0.002                        | 0.126              | 1.7374                        | ENSE.PTH          |
| 5     | ENSE.SAL             | 0.175      | 0.17  | 0.171 | 0.003                        | 0.172              | 2.375                         | ENSE.SAL          |
| 6     | ENSE.SAC             | 0.081      | 0.08  | 0.078 | 0.002                        | 0.079              | 1.0861                        | ENSE.SAC          |

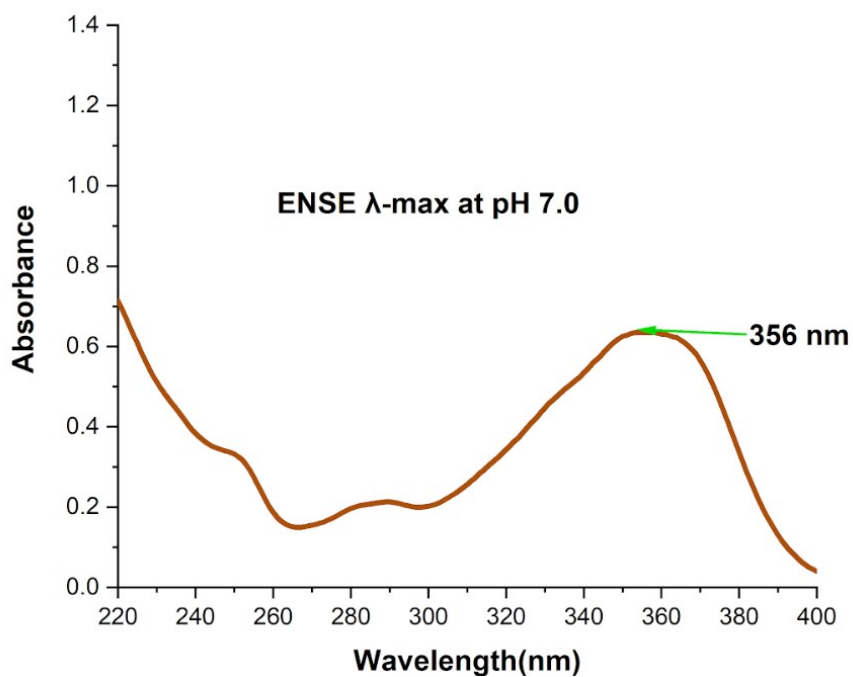

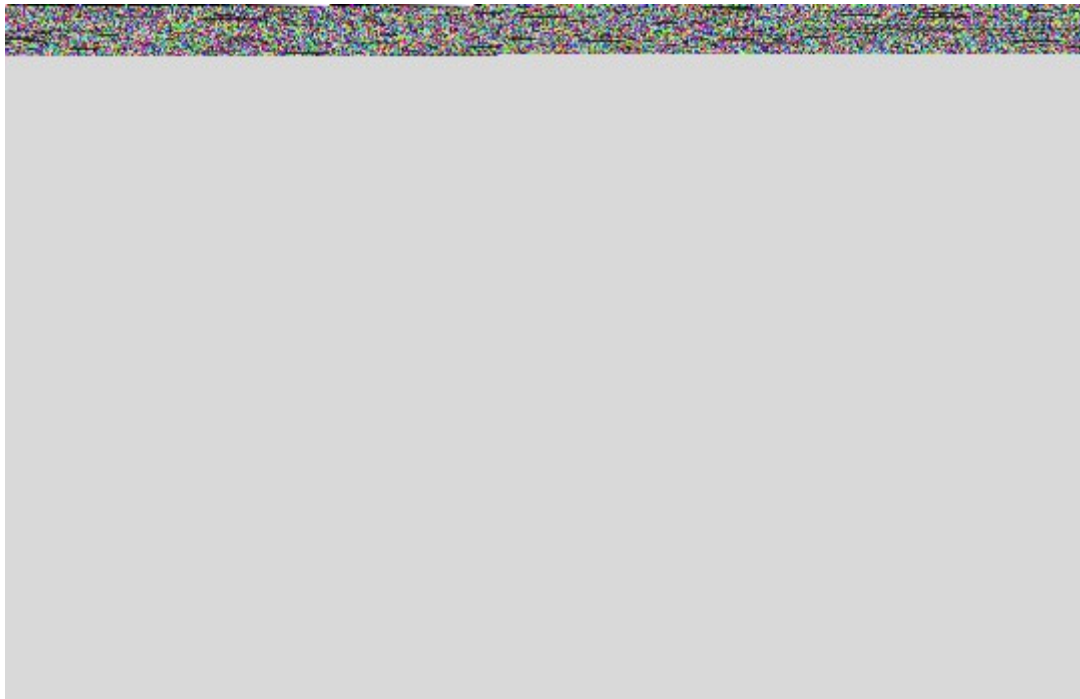

| S.No. | Sample Name          | Absorbance |       |       | Estimated Standard Deviation | Average Absorbance | Average Concentration (mg/mL) | Final solid phase    |
|-------|----------------------|------------|-------|-------|------------------------------|--------------------|-------------------------------|----------------------|
|       |                      |            |       |       |                              |                    |                               |                      |
| 1     | ENSE                 | 1.886      | 1.883 | 1.885 | 0.002                        | 1.884              | 0.029                         | ENSE                 |
| 2     | ENSE.MAL( $\alpha$ ) | 0.402      | 0.404 | 0.399 | 0.003                        | 0.402              | 6.329                         | ENSE.MAL( $\alpha$ ) |
| 3     | ENSE.MAL( $\beta$ )  | 0.381      | 0.382 | 0.386 | 0.003                        | 0.383              | 6.029                         | ENSE.MAL( $\beta$ )  |
| 4     | ENSE.PTH             | 0.36       | 0.362 | 0.36  | 0.001                        | 0.361              | 5.689                         | ENSE.PTH             |
| 5     | ENSE.SAL             | 0.115      | 0.117 | 0.116 | 0.001                        | 0.116              | 1.8281                        | ENSE.SAL             |
| 6     | ENSE.SAC             | 0.492      | 0.49  | 0.491 | 0.001                        | 0.491              | 7.7376                        | ENSE.SAC             |

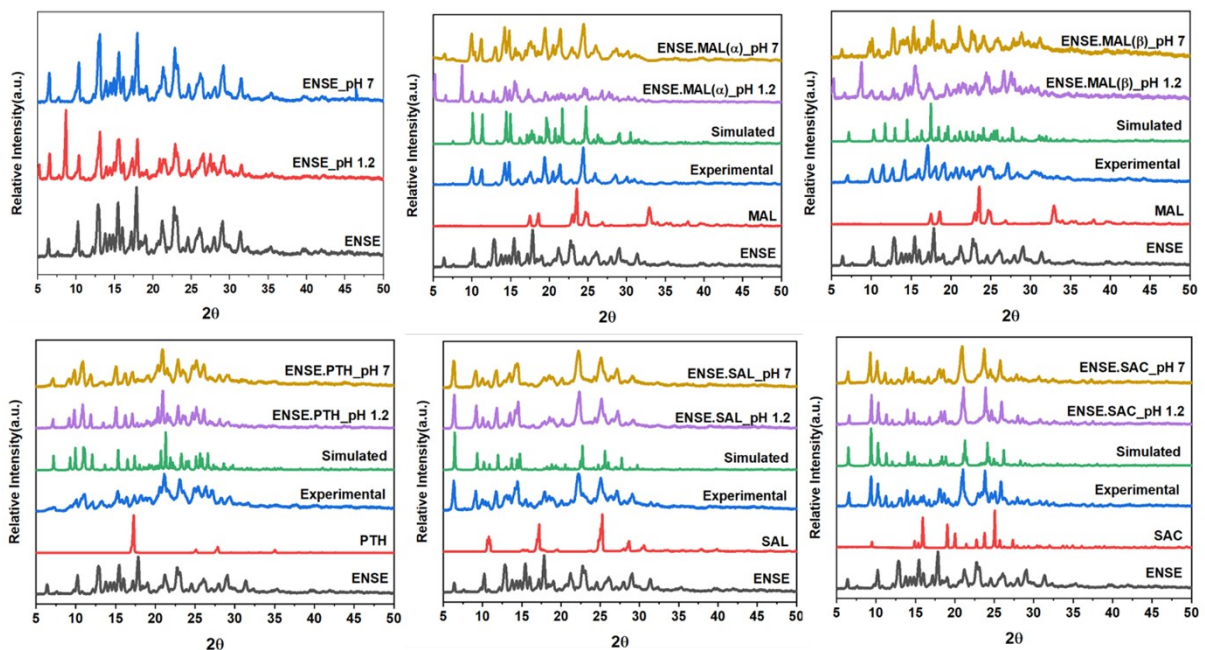

**Figure S6.** Overlay PXRD of ENSE solid forms before and after the solubility test, relative to their starting materials.

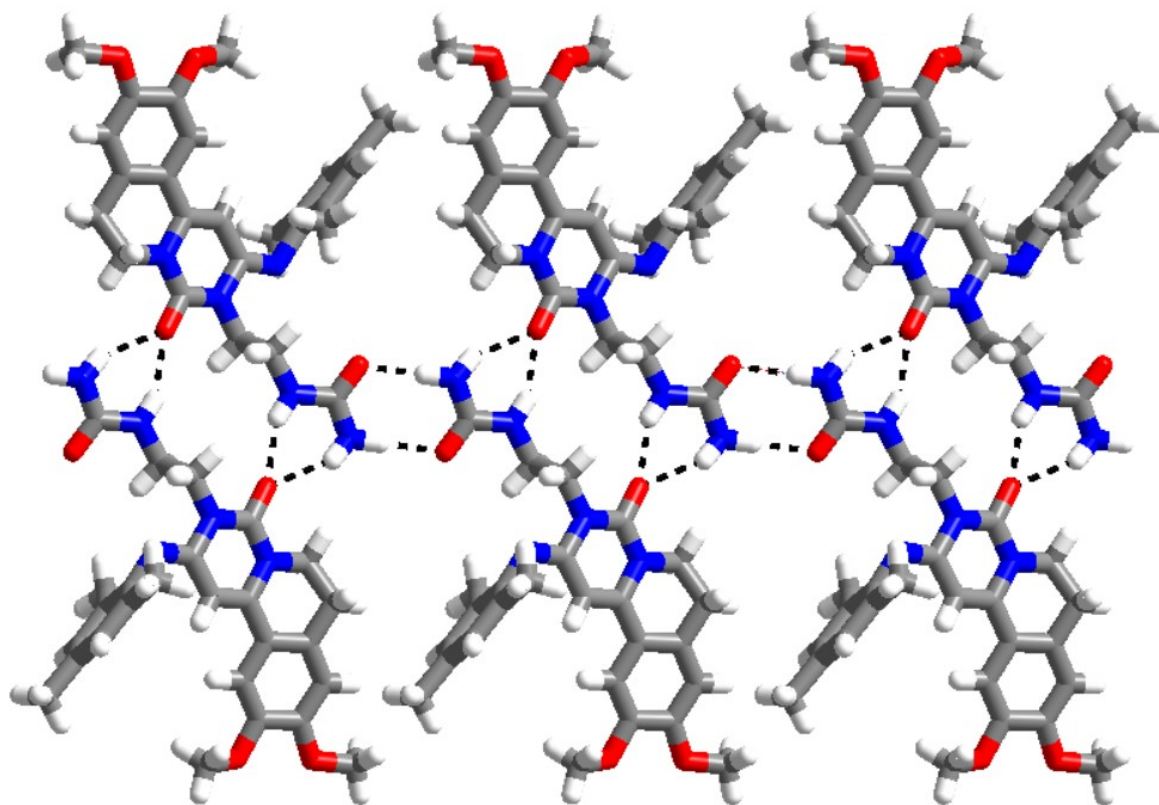

**Figure S7.** Illustration of molecular recognition between ENSE molecules.

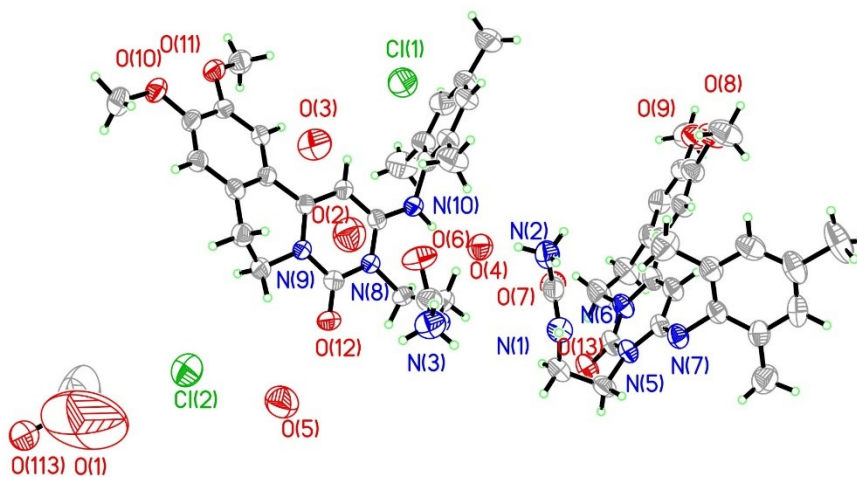

**Figure S8.** ORTEP view of ENSE.Cl. Herein, the ellipsoids are drawn with a 50% probability.

**Table S3.** Crystallographic Parameters of ENSE.Cl.

| Parameters                              | ENSE.Cl                                                                                |
|-----------------------------------------|----------------------------------------------------------------------------------------|
| Formula                                 | 2(C <sub>26</sub> H <sub>32</sub> N <sub>5</sub> O <sub>4</sub> ); 1(C O); 2(Cl); 4(O) |
| $M_r$                                   | 1120.04                                                                                |
| crystal shape                           | Needle                                                                                 |
| crystal colour                          | Colorless                                                                              |
| crystal system                          | Triclinic                                                                              |
| space group                             | $P\bar{1}$                                                                             |
| $T$ , K                                 | 273(2)                                                                                 |
| $\lambda(\text{Mo-K}\alpha)/\text{\AA}$ | 0.71073                                                                                |

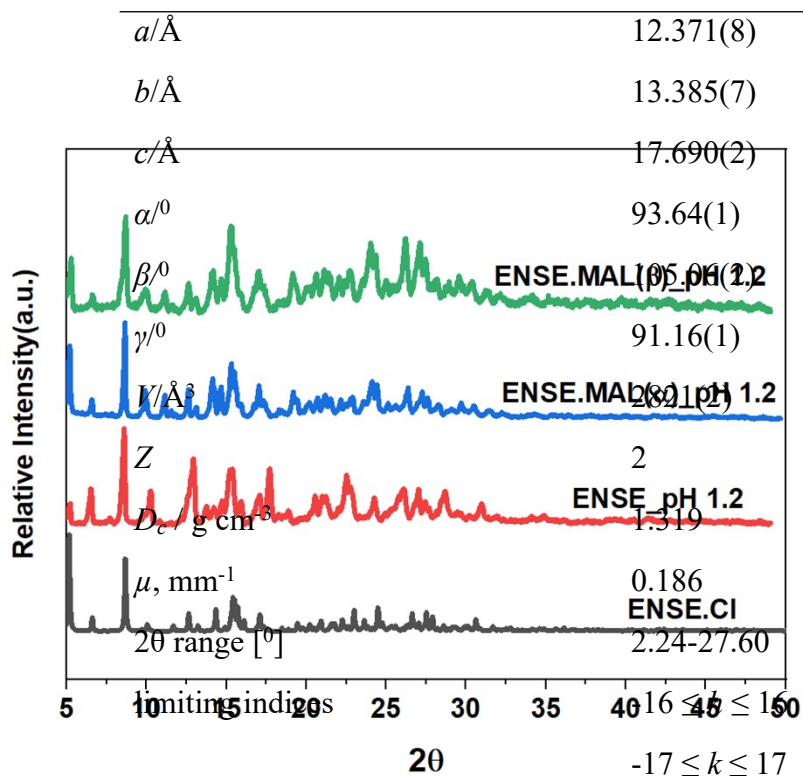

Figure

$-17 \leq k \leq 17$

S9.

|                                |         |
|--------------------------------|---------|
| $F(000)$                       | 1180    |
| total reflections              | 54109   |
| unique reflections             | 13090   |
| reflection at $I > 2\sigma(I)$ | 5756    |
| No. of parameters              | 728     |
| $R_1, I > 2\sigma(I)$          | 0.0751  |
| $wR_2, I > 2\sigma(I)$         | 0.2536  |
| GoF on $F^2$                   | 1.110   |
| CCDC No.                       | 2349985 |

Following the solubility test, a comparative PXRD overlay of all the solid forms of ENSE showed the development of discrete, stable adducts that matched the simulated pattern of ENSE.Cl.
